# Supplementary material
Source: ML conference proceedings conference paper supplement (https://openaccess.thecvf.com/content/ICCV2023/html/Liu_Multi-interactive_Feature_Learning_ICCV_2023_paper.html)
Supplement: Supplementary file 25 [file Liu_Multi-interactive_Feature_Learning_ICCV_2023_supplemental.zip]

Image Pairs: **900** Category: **5**

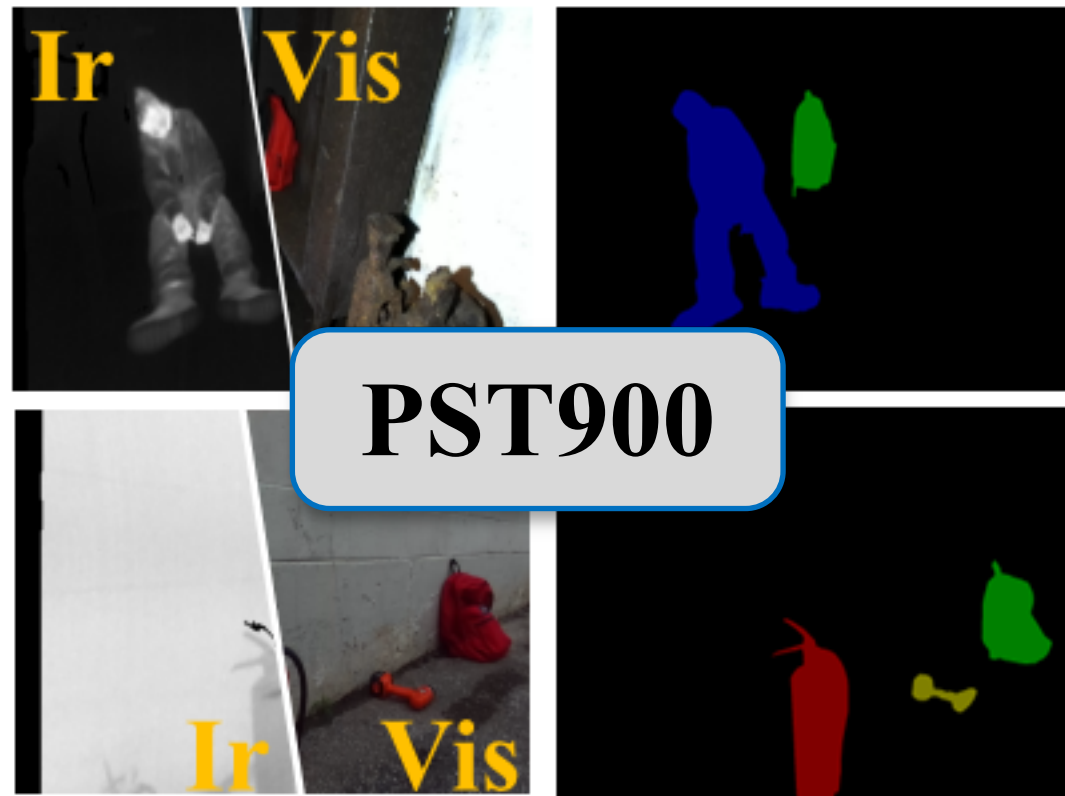

Unlabeled: **97.0%**

Image Pairs: **1606** Category: **8**

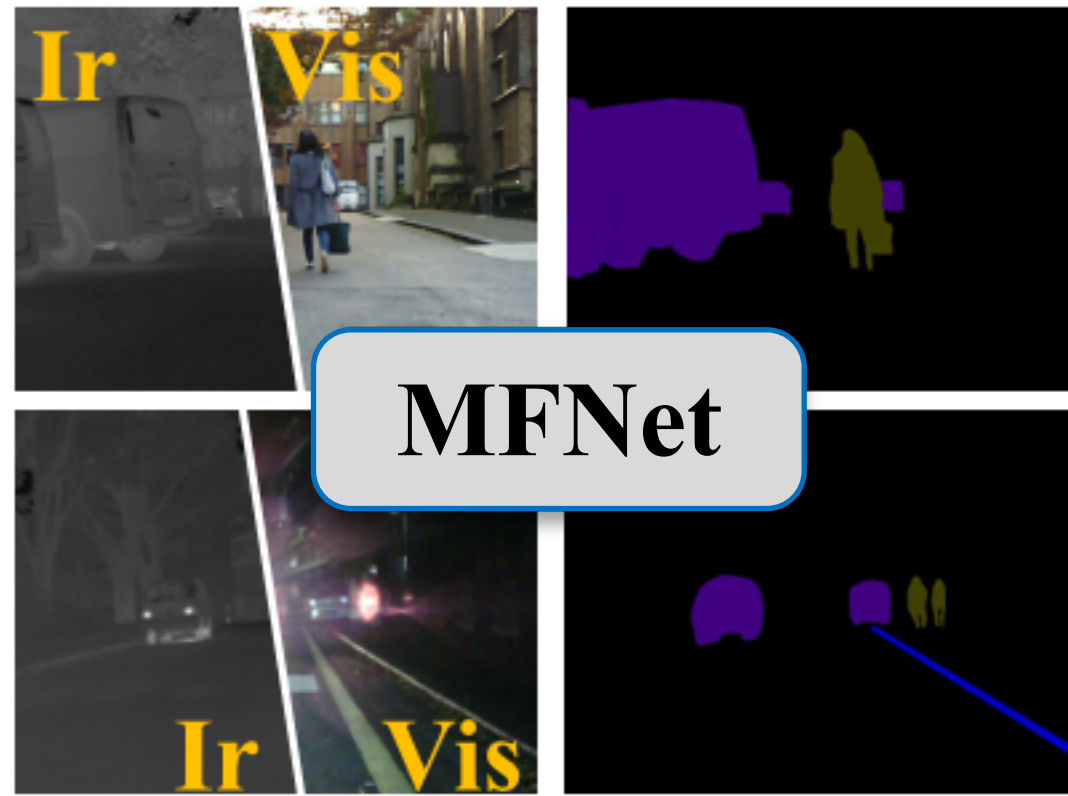

Unlabeled: **91.3%**

Image Pairs: **1500** Category: **14**

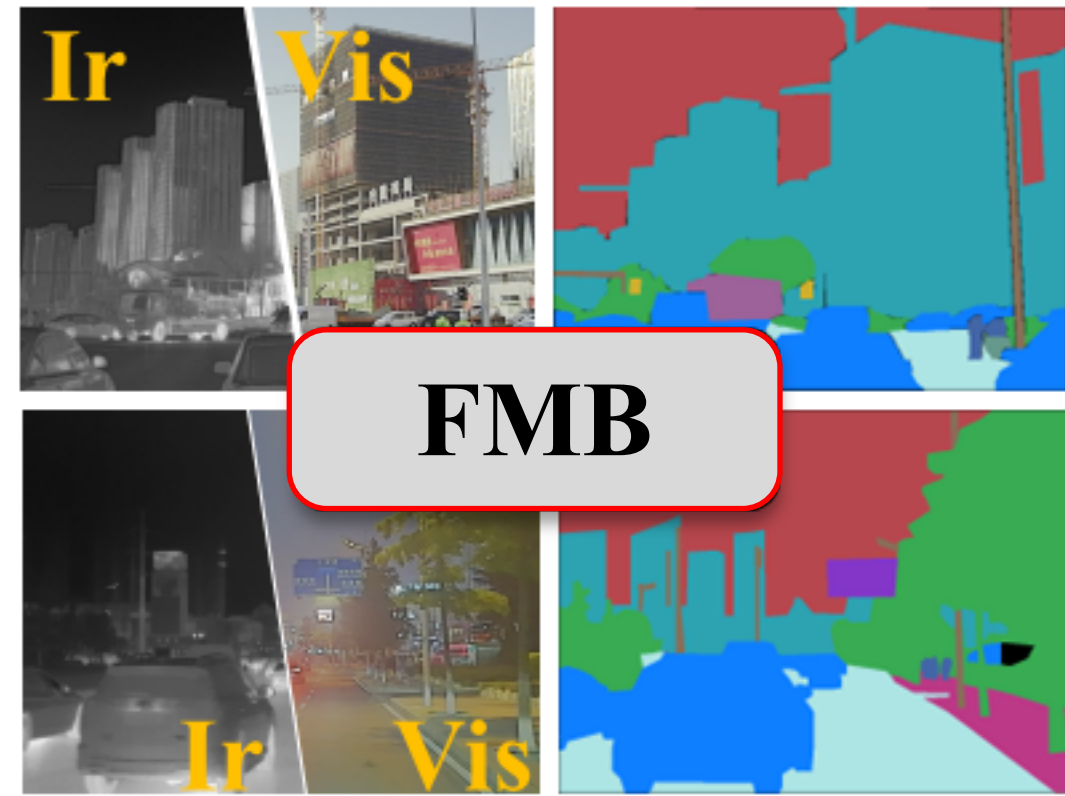

Unlabeled: **1.84%**
