# Supplementary material
Source: ML conference proceedings conference paper supplement (https://openaccess.thecvf.com/content/ICCV2023/html/Liu_Multi-interactive_Feature_Learning_ICCV_2023_paper.html)
Supplement: Supplementary file 68 [file Liu_Multi-interactive_Feature_Learning_ICCV_2023_supplemental.zip]

Values of The Metric

MFNet Dataset

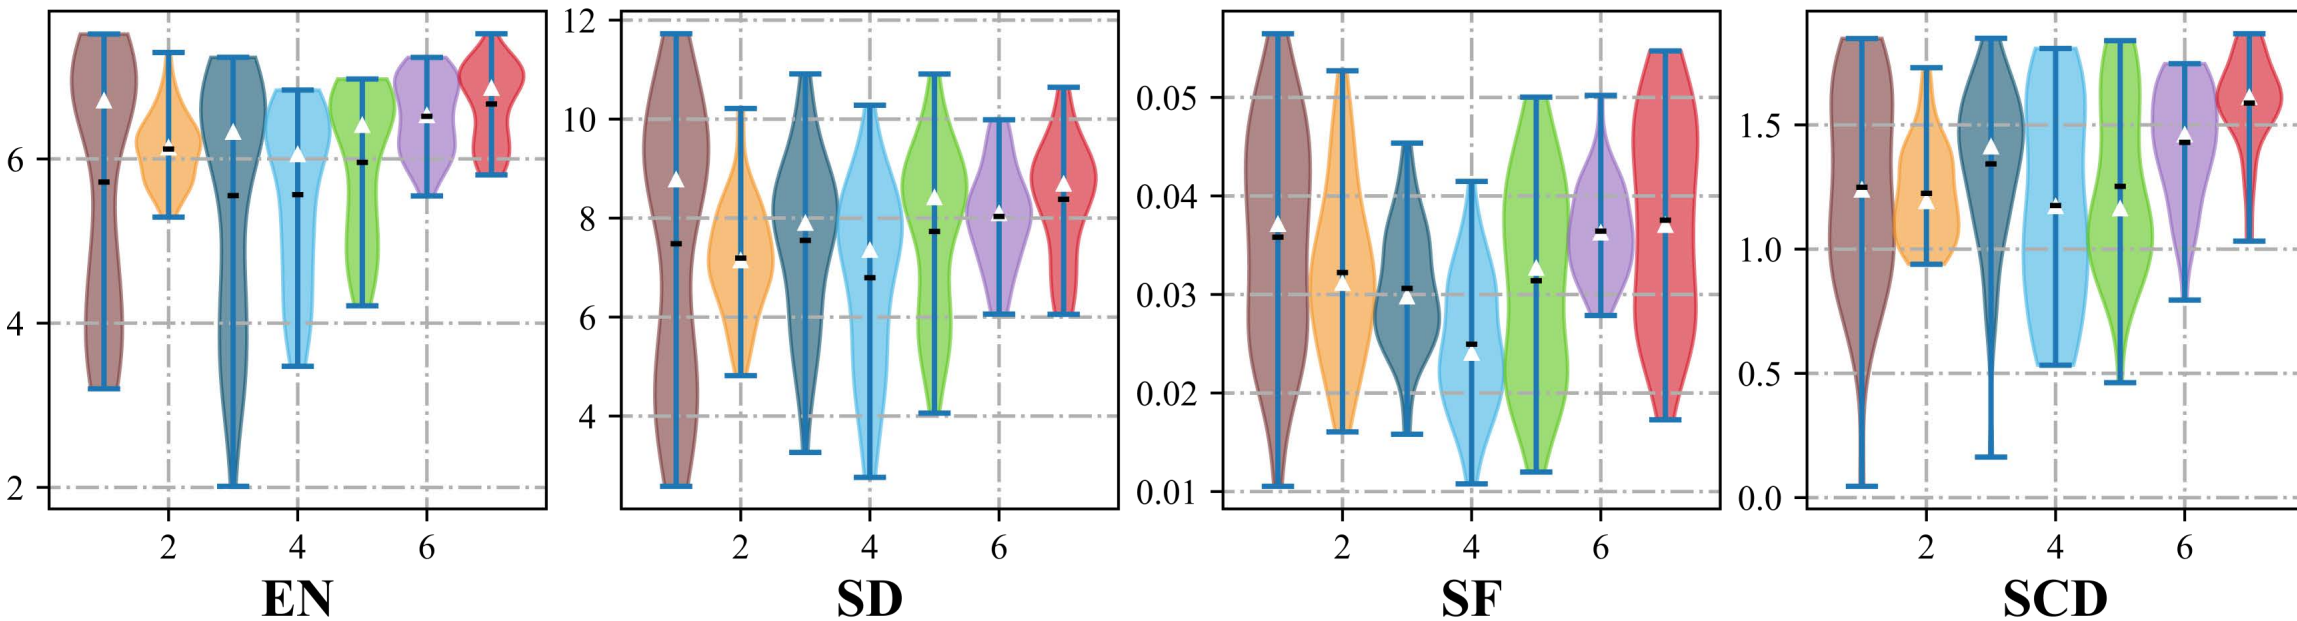

MSP Dataset

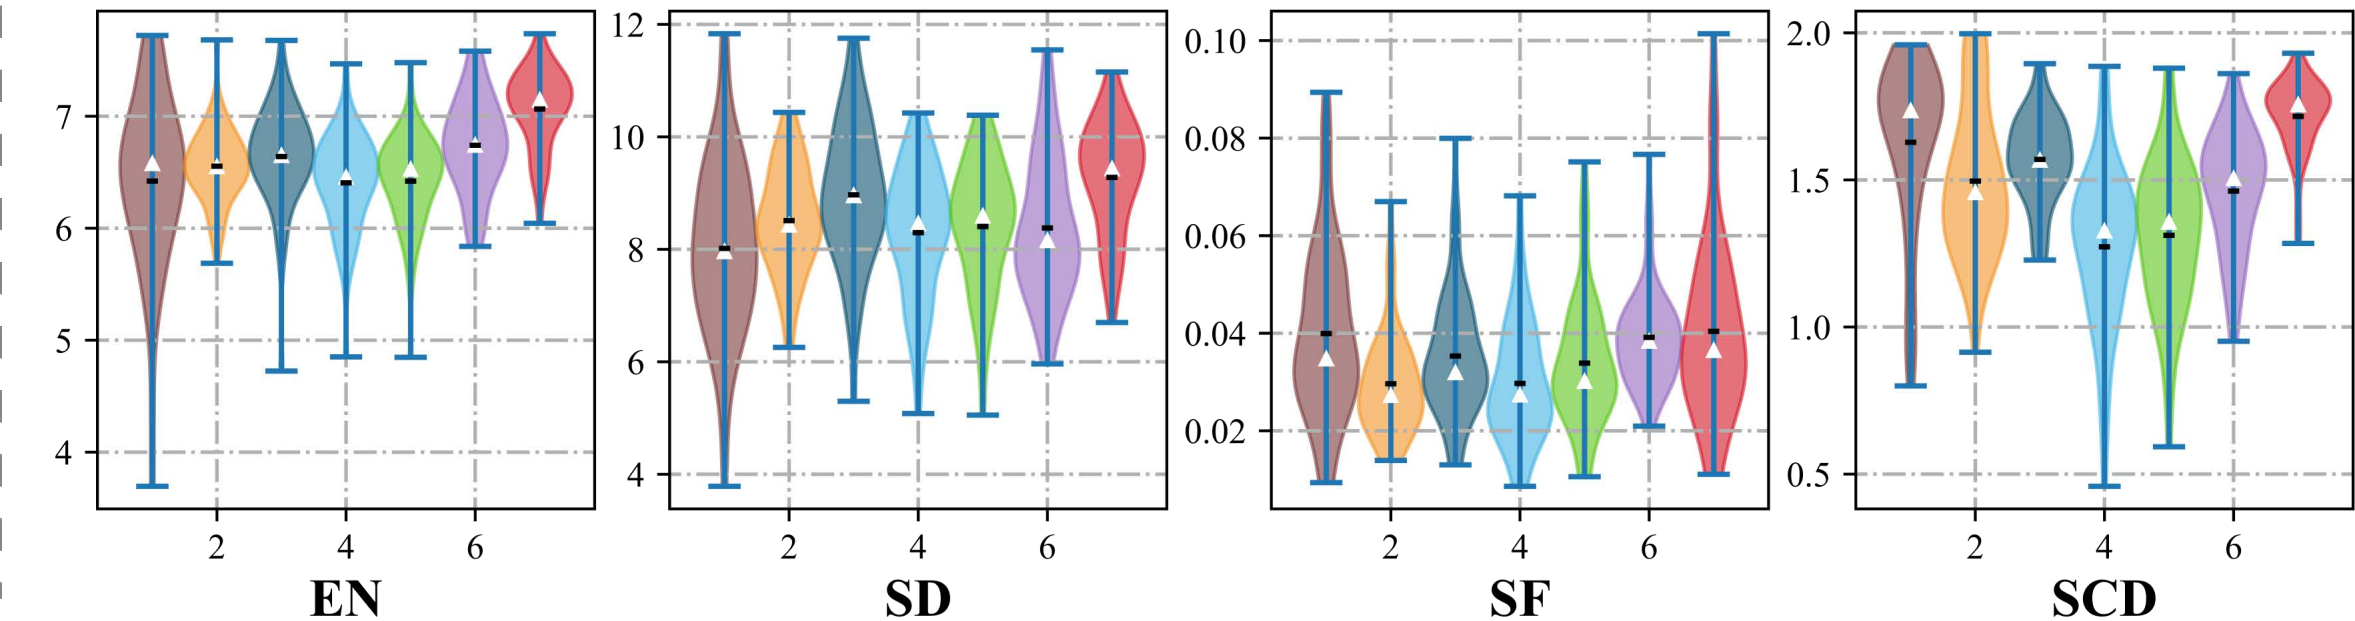

DIDFuse DenseFuse ReCoNet UMFusion U2Fusion TarDAL Ours
